# Supplementary material for: Damage induced by the 25 April 2015 Nepal earthquake in the Tibetan border region of China and increased post-seismic hazards
Source: Copernicus journal article supplement (doi:10.5194/nhess-19-873-2019), 2019-04-18
Supplement: Supplementary file 1 [file nhess-19-873-2019-supplement.zip]

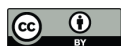

## *Supplement of*

# **Damage induced by the 25 April 2015 Nepal earthquake in the Tibetan border region of China and increased post-seismic hazards**

**Zhonghai Wu et al.**

*Correspondence to:* Zhonghai Wu ([wuzhonghai@geomech.ac.cn](mailto:wuzhonghai@geomech.ac.cn))

- [nhess-19-873-2019-supplement-title-page.pdf](#)
- Seismic intensity survey sites
  - [Guoba village.jpg](#)
  - [Nepal earthquake seismic intensity survey.kmz](#)
  - [Rema Village.JPG](#)
  - [Sale town.jpg](#)
  - [Zhangmu town 01.JPG](#)
  - [Zhangmu town 02.JPG](#)
  - [Zhangmu town 03.JPG](#)
  - [Zuobude villiage.JPG](#)
- [Supplement-Intensity Scale in China \(GBT 17742–2008\).doc](#)

The copyright of individual parts of the supplement might differ from the CC BY 4.0 License.
